# Supplementary material for: Influence of the HER receptor ligand system on sensitivity to cetuximab and trastuzumab in gastric cancer cell lines
Source: Springer Nature journal article supplement (doi:10.1007/s00432-016-2308-z), 2016-12-08
Supplement: MOESM2 [file 11806010]

Influence of the Her-receptor ligand system on sensitivity to cetuximab and trastuzumab in gastric cancer cell lines

Journal of Cancer Research and Clinical Oncology

Julia Kneissl, Anja Hartmann, Nicole Pfarr, Franziska Erlmeier, Thomas Lorber, Simone Keller, Gwen Zwingenberger, Wilko Weichert, Birgit Luber

Correspondence to: Dr. Birgit Luber, Institute of Pathology, Technische Universität München, Klinikum rechts der Isar, Trogerstr. 18, D-81675 München, Germany, E-mail: [birgit.luber@tum.de](mailto:birgit.luber@tum.de)

| p-values |                          | p ≤ 0,05          |            |                        |           |                       |              |                          |            |                        |       |
|----------|--------------------------|-------------------|------------|------------------------|-----------|-----------------------|--------------|--------------------------|------------|------------------------|-------|
|          |                          | p ≤ 0,01          |            |                        |           |                       |              |                          |            |                        |       |
| GSU      |                          |                   |            |                        |           |                       |              |                          |            |                        |       |
| pEGFR    |                          |                   |            |                        |           |                       |              |                          |            |                        |       |
|          | 1                        | 2                 | 3          | 4                      | 5         | 6                     | 7            | 8                        | 9          | 10                     |       |
|          | GSU_untreated            | GSU_trastuzumab   | GSU_AREG   | GSU_trastuzumab/AREG   | GSU_EGF   | GSU_trastuzumab/EGF   | GSU_HB-EGF   | GSU_trastuzumab/HB-EGF   | GSU_TGFα   | GSU_trastuzumab/TGFα   |       |
| 1        | GSU_untreated            |                   | 0,038      | 0,816                  | 0,011     | 0,611                 | 0,021        | 0,317                    | 0,42       | 0,021                  | 0,11  |
| 2        | GSU_trastuzumab          | 0,038             |            | 0,027                  | 0,192     | 0,02                  | 0,09         | 0,024                    | 0,05       | 0,018                  | 0,242 |
| 3        | GSU_AREG                 | 0,816             | 0,027      |                        | 0,049     | 0,583                 | 0,145        | 0,437                    | 0,574      | 0,128                  | 0,122 |
| 4        | GSU_trastuzumab/AREG     | 0,011             | 0,192      | 0,049                  |           | 0,015                 | 0,163        | 0,005                    | 0,159      | 0,002                  | 0,955 |
| 5        | GSU_EGF                  | 0,611             | 0,02       | 0,583                  | 0,015     |                       | 0,044        | 0,812                    | 0,312      | 0,176                  | 0,074 |
| 6        | GSU_trastuzumab/EGF      | 0,021             | 0,09       | 0,145                  | 0,163     | 0,044                 |              | 0,012                    | 0,431      | 0,003                  | 0,471 |
| 7        | GSU_HB-EGF               | 0,317             | 0,024      | 0,437                  | 0,005     | 0,812                 | 0,012        |                          | 0,244      | 0,128                  | 0,071 |
| 8        | GSU_trastuzumab/HB-EGF   | 0,42              | 0,05       | 0,574                  | 0,159     | 0,312                 | 0,431        | 0,244                    |            | 0,101                  | 0,254 |
| 9        | GSU_TGFα                 | 0,021             | 0,018      | 0,128                  | 0,002     | 0,176                 | 0,003        | 0,128                    | 0,101      |                        | 0,043 |
| 10       | GSU_trastuzumab/TGFα     | 0,11              | 0,242      | 0,122                  | 0,955     | 0,074                 | 0,471        | 0,071                    | 0,254      | 0,043                  |       |
| GSU      |                          |                   |            |                        |           |                       |              |                          |            |                        |       |
| pHer2    |                          |                   |            |                        |           |                       |              |                          |            |                        |       |
|          | 1                        | 2                 | 3          | 4                      | 5         | 6                     | 7            | 8                        | 9          | 10                     |       |
|          | GSU_untreated            | GSU_trastuzumab   | GSU_AREG   | GSU_trastuzumab/AREG   | GSU_EGF   | GSU_trastuzumab/EGF   | GSU_HB-EGF   | GSU_trastuzumab/HB-EGF   | GSU_TGFα   | GSU_trastuzumab/TGFα   |       |
| 1        | GSU_untreated            |                   | 0,235      | 0,379                  | 0,671     | 0,298                 | 0,713        | 0,162                    | 0,636      | 0,157                  | 0,542 |
| 2        | GSU_trastuzumab          | 0,235             |            | 0,145                  | 0,296     | 0,134                 | 0,287        | 0,102                    | 0,168      | 0,101                  | 0,419 |
| 3        | GSU_AREG                 | 0,379             | 0,145      |                        | 0,035     | 0,518                 | 0,057        | 0,085                    | 0,614      | 0,059                  | 0,21  |
| 4        | GSU_trastuzumab/AREG     | 0,671             | 0,296      | 0,035                  |           | 0,027                 | 0,924        | 0,008                    | 0,274      | 0,012                  | 0,708 |
| 5        | GSU_EGF                  | 0,298             | 0,134      | 0,518                  | 0,027     |                       | 0,045        | 0,117                    | 0,442      | 0,03                   | 0,18  |
| 6        | GSU_trastuzumab/EGF      | 0,713             | 0,287      | 0,057                  | 0,924     | 0,045                 |              | 0,015                    | 0,304      | 0,02                   | 0,68  |
| 7        | GSU_HB-EGF               | 0,162             | 0,102      | 0,085                  | 0,008     | 0,117                 | 0,015        |                          | 0,192      | 0,827                  | 0,115 |
| 8        | GSU_trastuzumab/HB-EGF   | 0,636             | 0,168      | 0,614                  | 0,274     | 0,442                 | 0,304        | 0,192                    |            | 0,181                  | 0,314 |
| 9        | GSU_TGFα                 | 0,157             | 0,101      | 0,059                  | 0,012     | 0,03                  | 0,02         | 0,827                    | 0,181      |                        | 0,114 |
| 10       | GSU_trastuzumab/TGFα     | 0,542             | 0,419      | 0,21                   | 0,708     | 0,18                  | 0,68         | 0,115                    | 0,314      | 0,114                  |       |
| MKN45    |                          |                   |            |                        |           |                       |              |                          |            |                        |       |
| pEGFR    |                          |                   |            |                        |           |                       |              |                          |            |                        |       |
|          | 1                        | 2                 | 3          | 4                      | 5         | 6                     | 7            | 8                        | 9          | 10                     |       |
|          | MKN45_untreated          | MKN45_trastuzumab | MKN45_AREG | MKN45_trastuzumab/AREG | MKN45_EGF | MKN45_trastuzumab/EGF | MKN45_HB-EGF | MKN45_trastuzumab/HB-EGF | MKN45_TGFα | MKN45_trastuzumab/TGFα |       |
| 1        | MKN45_untreated          |                   | 0,384      | 0,658                  | 0,434     | 0,611                 | 0,656        | 0,646                    | 0,714      | 0,59                   | 0,423 |
| 2        | MKN45_trastuzumab        | 0,384             |            | 0,689                  | 0,973     | 0,747                 | 0,762        | 0,535                    | 0,433      | 0,496                  | 0,357 |
| 3        | MKN45_AREG               | 0,658             | 0,689      |                        | 0,719     | 0,946                 | 0,969        | 0,579                    | 0,542      | 0,534                  | 0,383 |
| 4        | MKN45_trastuzumab/AREG   | 0,434             | 0,973      | 0,719                  |           | 0,77                  | 0,774        | 0,533                    | 0,434      | 0,494                  | 0,355 |
| 5        | MKN45_EGF                | 0,611             | 0,747      | 0,946                  | 0,77      |                       | 0,982        | 0,57                     | 0,52       | 0,526                  | 0,377 |
| 6        | MKN45_trastuzumab/EGF    | 0,656             | 0,762      | 0,969                  | 0,774     | 0,982                 |              | 0,574                    | 0,536      | 0,529                  | 0,379 |
| 7        | MKN45_HB-EGF             | 0,646             | 0,535      | 0,579                  | 0,533     | 0,57                  | 0,574        |                          | 0,758      | 0,918                  | 0,725 |
| 8        | MKN45_trastuzumab/HB-EGF | 0,714             | 0,433      | 0,542                  | 0,434     | 0,52                  | 0,536        | 0,758                    |            | 0,686                  | 0,495 |
| 9        | MKN45_TGFα               | 0,59              | 0,496      | 0,534                  | 0,494     | 0,526                 | 0,529        | 0,918                    | 0,686      |                        | 0,811 |
| 10       | MKN45_trastuzumab/TGFα   | 0,423             | 0,357      | 0,383                  | 0,355     | 0,377                 | 0,379        | 0,725                    | 0,495      | 0,811                  |       |
| MKN45    |                          |                   |            |                        |           |                       |              |                          |            |                        |       |
| pHer2    |                          |                   |            |                        |           |                       |              |                          |            |                        |       |
|          | 1                        | 2                 | 3          | 4                      | 5         | 6                     | 7            | 8                        | 9          | 10                     |       |
|          | MKN45_untreated          | MKN45_trastuzumab | MKN45_AREG | MKN45_trastuzumab/AREG | MKN45_EGF | MKN45_trastuzumab/EGF | MKN45_HB-EGF | MKN45_trastuzumab/HB-EGF | MKN45_TGFα | MKN45_trastuzumab/TGFα |       |
| 1        | MKN45_untreated          |                   | 0,664      | 0,791                  | 0,973     | 0,966                 | 0,839        | 0,477                    | 0,816      | 0,674                  | 0,845 |
| 2        | MKN45_trastuzumab        | 0,664             |            | 0,649                  | 0,467     | 0,638                 | 0,734        | 0,521                    | 0,583      | 0,289                  | 0,332 |
| 3        | MKN45_AREG               | 0,791             | 0,649      |                        | 0,612     | 0,789                 | 0,946        | 0,186                    | 0,845      | 0,367                  | 0,433 |
| 4        | MKN45_trastuzumab/AREG   | 0,973             | 0,467      | 0,612                  |           | 0,923                 | 0,738        | 0,249                    | 0,647      | 0,609                  | 0,815 |
| 5        | MKN45_EGF                | 0,966             | 0,638      | 0,789                  | 0,923     |                       | 0,853        | 0,418                    | 0,821      | 0,597                  | 0,774 |
| 6        | MKN45_trastuzumab/EGF    | 0,839             | 0,734      | 0,946                  | 0,738     | 0,853                 |              | 0,429                    | 0,992      | 0,443                  | 0,577 |
| 7        | MKN45_HB-EGF             | 0,477             | 0,521      | 0,186                  | 0,249     | 0,418                 | 0,429        |                          | 0,168      | 0,187                  | 0,173 |
| 8        | MKN45_trastuzumab/HB-EGF | 0,816             | 0,583      | 0,845                  | 0,647     | 0,821                 | 0,992        | 0,168                    |            | 0,384                  | 0,46  |
| 9        | MKN45_TGFα               | 0,674             | 0,289      | 0,367                  | 0,609     | 0,597                 | 0,443        | 0,187                    | 0,384      |                        | 0,746 |
| 10       | MKN45_trastuzumab/TGFα   | 0,845             | 0,332      | 0,433                  | 0,815     | 0,774                 | 0,577        | 0,173                    | 0,46       | 0,746                  |       |

## Figure legend

**Online Resource 8** Effect of trastuzumab and concomitant ligand application on pEGFR and pHER2 levels in GSU and MKN45 cells – list of all significant p-values (referring to Fig. 8)

GSU and MKN45 cells were treated for 6 h with 10 µg/ml trastuzumab (Tra) and 15 ng/ml AREG (A) or 0.1 ng/ml EGF (E) or 0.4 ng/ml HB-EGF (H) or 0.75 ng/ml TGFα (T). Subsequently, pEGFR and pHER levels were determined by Western blot analysis.
